# Supplementary material
Source: MDPI journal article supplement (https://www.mdpi.com/2075-4701/8/2/113)

**Figure S1.** Optical images of samples surface before and after FSP

AA1050H24-Graphene Nanocomposite  
AFTER FSP

Interface FSP – Nanocomposite + BM

Base Metal AA1050-H24 (BM)  
BEFORE FSP

**5x**

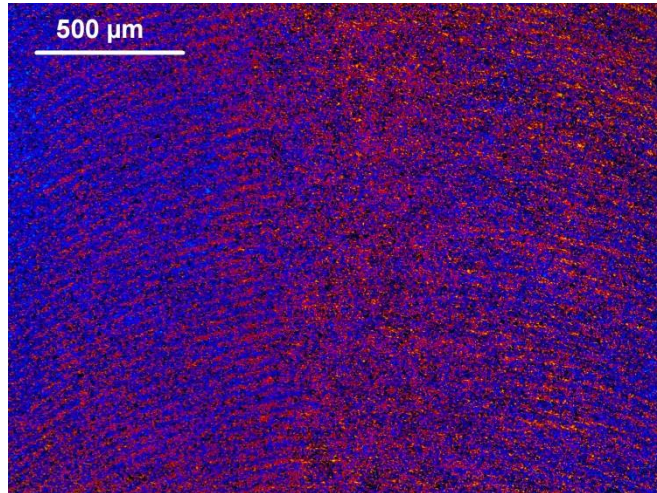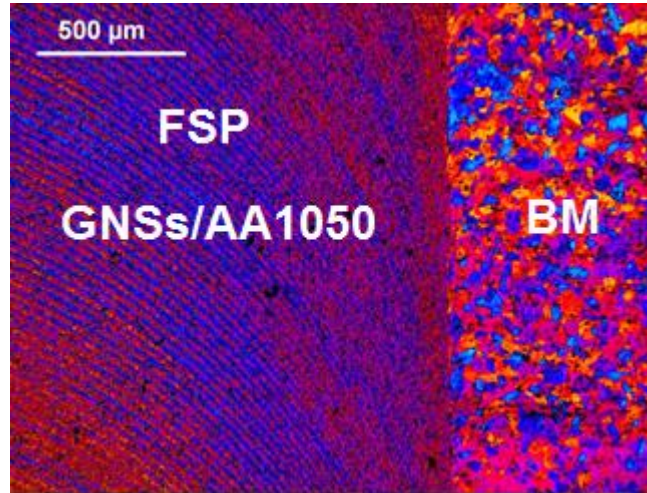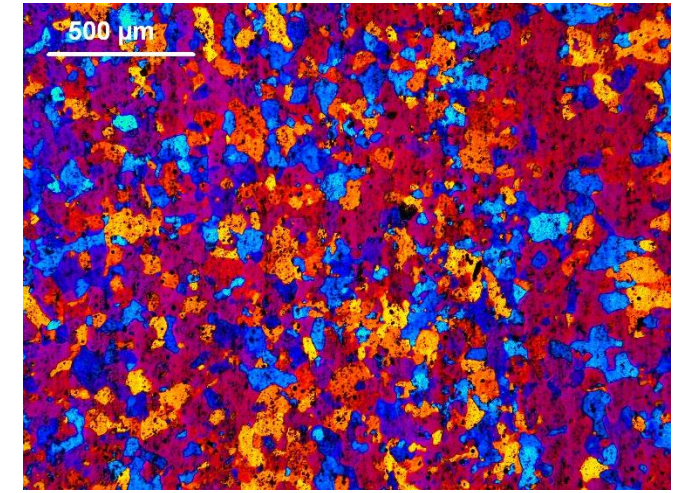

**10x**

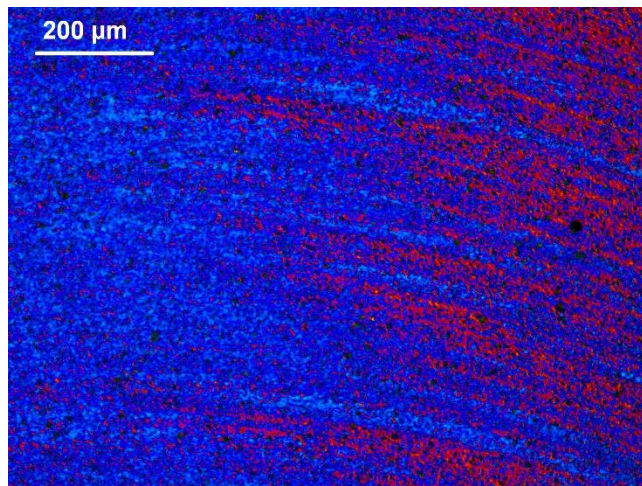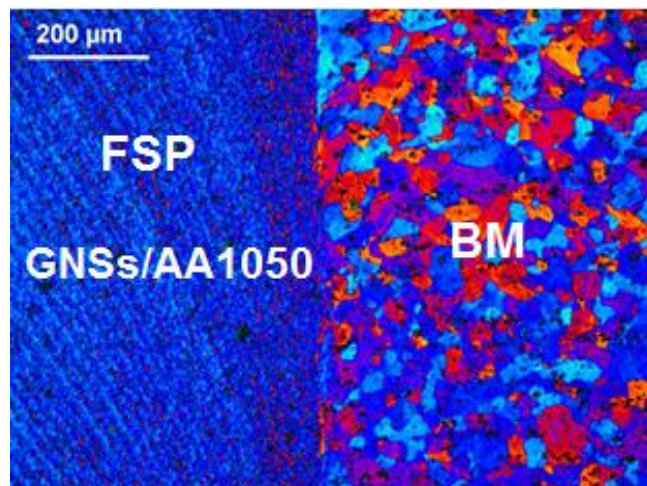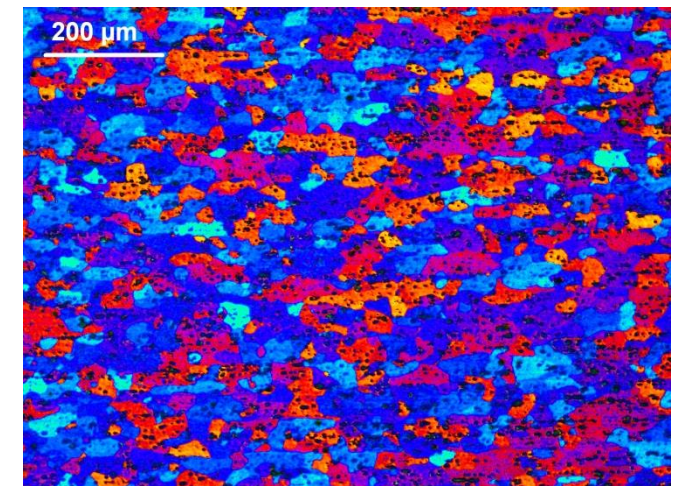



Figure S2. SEM images of samples surface before and after FSP

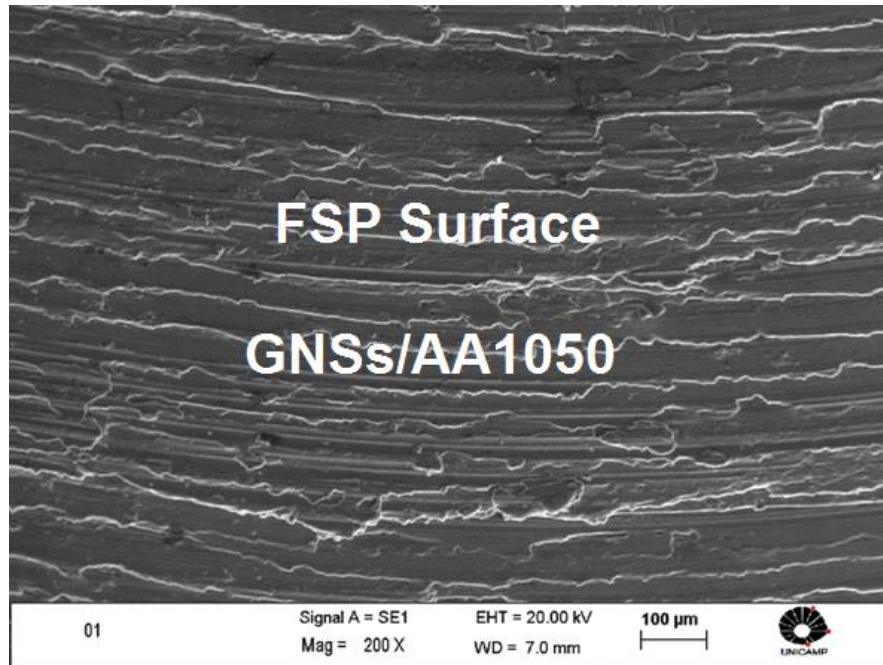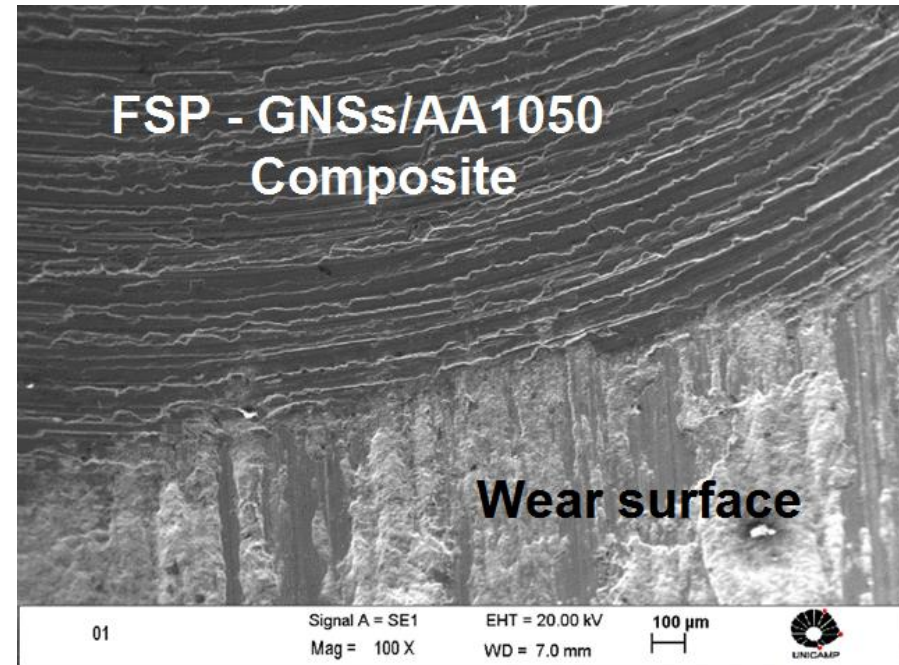

Supplement: s1 [file s1]
